# Supplementary material
Source: HighWire-hosted journal article supplement (http://www.annfammed.org/highwire/filestream/8789/field_highwire_adjunct_files/0/Conejo-Ceron_Supp_Apps.pdf)
Supplement: Conejo-Ceron_Supp_Apps.pdf [file Conejo-Ceron_Supp_Apps.pdf]

**Supplemental materials for:**

Conejo-Cerón S, Moreno-Peral P, Rodríguez-Morejón A, et al. Effectiveness of psychological and educational interventions to prevent depression in primary care: a systematic review and meta-analysis. *Ann Fam Med.* 2017;15(3):262-271.

## APPENDIX

PubMed search strategy:

(randomized controlled trial [Publication Type] OR (random\*[Title/Abstract] AND controlled [Title/Abstract] AND trial[Title/Abstract])) AND (“depressive disorder”[MeSH Terms] OR “depressive disorder” OR depress\* OR “depression”[MeSH Terms]) AND prevent\* AND (intervention\* OR program\* OR strateg\*) AND (“Primary Health Care”[MH])

**Table S1.** Excluded articles and reasons for exclusion

| <b>Excluded studies</b>                                                                                                                                                                                                                                                                                                                                                                                   |                                                                                                      |
|-----------------------------------------------------------------------------------------------------------------------------------------------------------------------------------------------------------------------------------------------------------------------------------------------------------------------------------------------------------------------------------------------------------|------------------------------------------------------------------------------------------------------|
| <b>Study</b>                                                                                                                                                                                                                                                                                                                                                                                              | <b>Reasons for exclusion</b>                                                                         |
| Alexopoulos GS, Reynolds CF 3rd, Bruce ML, Katz IR, Raue PJ, Mulsant BH, Oslin DW, Ten Have T; PROSPECT Group. Reducing suicidal ideation and depression in older primary care patients: 24-month outcomes of the PROSPECT study. <i>Am J Psychiatry</i> . 2009;166(8):882-90.                                                                                                                            | The intervention includes taking medication, and it is not exclusively psychological or educational. |
| Almeida OP, Pirkis J, Kerse N, Sim M, Flicker L, Snowdon J, Draper B, Byrne G, Goldney R, Lautenschlager NT, Stocks N, Alfonso H, Pfaff JJ. A randomized trial to reduce the prevalence of depression and self-harm behavior in older primary care patients. <i>Ann Fam Med</i> . 2012;10(4):347-56.                                                                                                      | Participants depressed at baseline were not excluded.                                                |
| Cooper PJ, Pascalis L, Woolgar M, Romaniuk H, Murray L. Attempting to prevent postnatal depression by targeting the mother–infant relationship: a randomised controlled trial. <i>Prim Health Care Res Dev</i> . 2015;16(4):383-97.                                                                                                                                                                       | Did not focus on primary care setting.                                                               |
| Eisen JC, Marko-Holguin M, Fogel J, Cardenas A, Bahn M, Bradford N, Fagan B, Wiedmann P, Van Voorhees BW. Pilot Study of Implementation of an Internet-Based Depression Prevention Intervention (CATCH-IT) for Adolescents in 12 US Primary Care Practices: Clinical and Management /Organizational Behavioral Perspectives. <i>Prim Care Companion CNS Disord</i> . 2013;15(6).                          | The comparator was not usual care, no intervention, placebo or waiting list.                         |
| Elliott SA, Leverton TJ, Sanjack M, Turner H, Cowmeadow P, Hopkins J, Bushnell D. Promoting mental health after childbirth: a controlled trial of primary prevention of postnatal depression. <i>Br J Clin Psychol</i> . 2000;39 ( Pt 3):223-41.                                                                                                                                                          | Did not focus on primary care setting.                                                               |
| Hermanns N, Schmitt A, Gahr A, Herder C, Nowotny B, Roden M, Ohmann C, Kruse J, Haak T, Kulzer B. The effect of a Diabetes- Specific Cognitive Behavioral Treatment Program (DIAMOS) for patients with diabetes and subclinical depression: results of a randomized controlled trial. <i>Diabetes Care</i> . 2015; 38(4):551-60.                                                                          | Did not focus on primary care setting.                                                               |
| Hoek W, Marko M, Fogel J, Schuurmans J, Gladstone T, Bradford N, Domanico R, Fagan B, Bell C, Reinecke MA, Van Voorhees BW. Randomized controlled trial of primary care physician motivational interviewing versus brief advice to engage adolescents with an Internet Based depression prevention intervention: 6-month outcomes and predictors of improvement. <i>Transl Res</i> . 2011; 158(6):315-25. | Did not have a control group as usual care, no intervention, placebo or waiting list.                |
| Imai H, Furukawa TA, Okumiya K, Wada T, Fukutomi E, Sakamoto R, Fujisawa M, Ishimoto Y, Kimura Y, Chen WL, Tanaka M, Matsubayashi K. Postcard intervention for depression in community-dwelling older adults: A randomised controlled trial. <i>Psychiatry Res</i> . 2015;30; 229(1-2):545-50.                                                                                                            | Did not focus on primary care setting and participants depressed at baseline were not excluded.      |

|                                                                                                                                                                                                                                                                                                             |                                                                                                                                                                                                                              |
|-------------------------------------------------------------------------------------------------------------------------------------------------------------------------------------------------------------------------------------------------------------------------------------------------------------|------------------------------------------------------------------------------------------------------------------------------------------------------------------------------------------------------------------------------|
| Joling KJ, van Marwijk HW, Smit F, van der Horst HE, Scheltens P, van de Ven PM, Mittelman MS, van Hout HP. Does a family meetings intervention prevent depression and anxiety in family caregivers of dementia patients? A randomized trial. <i>PLoS One</i> . 2012;7(1):e30936.                           | Only 12% of the sample was recruited from primary care.                                                                                                                                                                      |
| Kauer SD, Reid SC, Crooke AH, Khor A, Hearps SJ, Jorm AF, Sancu L, Patton G. Self-monitoring using mobile phones in the early stages of adolescent depression: randomized controlled trial. <i>J Med Internet Res</i> . 2012; 25;14(3):e67.                                                                 | Participants depressed at baseline were not excluded.                                                                                                                                                                        |
| Kerr J, Patrick K, Norman G, Stein MB, Calfas K, Zabinski M, Robinson A. Randomized control trial of a behavioral intervention for overweight women: impact on depressive symptoms. <i>Depress Anxiety</i> . 2008; 25(7): 555-8.                                                                            | Participants depressed at baseline were not excluded.                                                                                                                                                                        |
| Lang AJ, Norman GJ, Casmar PV. A randomized trial of a brief mental health intervention for primary care patients. <i>J Consult Clin Psychol</i> . 2006 ;74(6):1173-9.                                                                                                                                      | Participants depressed at baseline were not excluded.                                                                                                                                                                        |
| Muñoz, R F.; Le, H-N; Ippen, C G; Diaz, M A.; Urizar, G G., Jr.; Soto, J; Mendelson, T; Delucchi, K; Lieberman, A F. Prevention of postpartum depression in low-income women: development of the "Mamas y Bebés"/Mothers and Babies Course. <i>Cognitive and Behavioral Practice</i> . 2007, v14 n1 p70-83. | Did not focus on primary care setting.                                                                                                                                                                                       |
| Otero P, Smit F, Cuijpers P, Torres A, Blanco V, Vázquez FL. Long-term efficacy of indicated prevention of depression in non-professional caregivers: randomized controlled trial. <i>Psychol Med</i> . 2015;45(7):1401-12.                                                                                 | Did not focus on primary care setting.                                                                                                                                                                                       |
| Reynolds CF 3rd, Thomas SB, Morse JQ, et al. Early intervention to preempt major depression among older black and white adults. <i>Psychiatr Serv</i> . 2014;65(6):765-73.                                                                                                                                  | Only 39% of the sample was recruited from primary care.                                                                                                                                                                      |
| van't Veer-Tazelaar PJ, Cuijpers P, Beekman AJ. Prevention of depression and anxiety in older people. <i>Tijdschr Psychiatr</i> . 2011;53(9): 579-84.                                                                                                                                                       | Reported similar results in Dutch and English (van 't Veer-Tazelaar PJ et al. Stepped-care prevention of anxiety and depression in late life. A randomized controlled trial. <i>Arch Gen Psychiatry</i> 2009;66(3):297-304.) |
| van der Aa HP, van Rens GH, Comijs HC, Margrain TH, Gallindo-Garre F, Twisk JW, van Nispen RM. Stepped care for depression and anxiety in visually impaired older adults: multicentre randomised controlled trial. <i>BMJ</i> . 2015;351:h6127.                                                             | Did not focus on primary care setting.                                                                                                                                                                                       |
| Vázquez F L, Hermida E, Torres A, Otero P, Blanco V, Díaz O. Efficacy of a brief cognitive-behavioral intervention in caregivers with high depressive symptoms. <i>Behavioral Psychology / Psicología Conductual</i> . 2014; 22 (1):79-96.                                                                  | Did not focus on primary care setting.                                                                                                                                                                                       |
| Vázquez González FL, Otero Otero P, Torres Iglesias A, Hermida García E, Blanco Seoane V, Díaz Fernández O. A brief problem-solving indicated-                                                                                                                                                              | Did not focus on primary care setting.                                                                                                                                                                                       |

|                                                                                                                            |  |
|----------------------------------------------------------------------------------------------------------------------------|--|
| prevention intervention for prevention of depression in nonprofessional caregivers. <i>Psicothema</i> . 2013; 25(1):87-92. |  |
|----------------------------------------------------------------------------------------------------------------------------|--|

**Figure S1.** Funnel plot

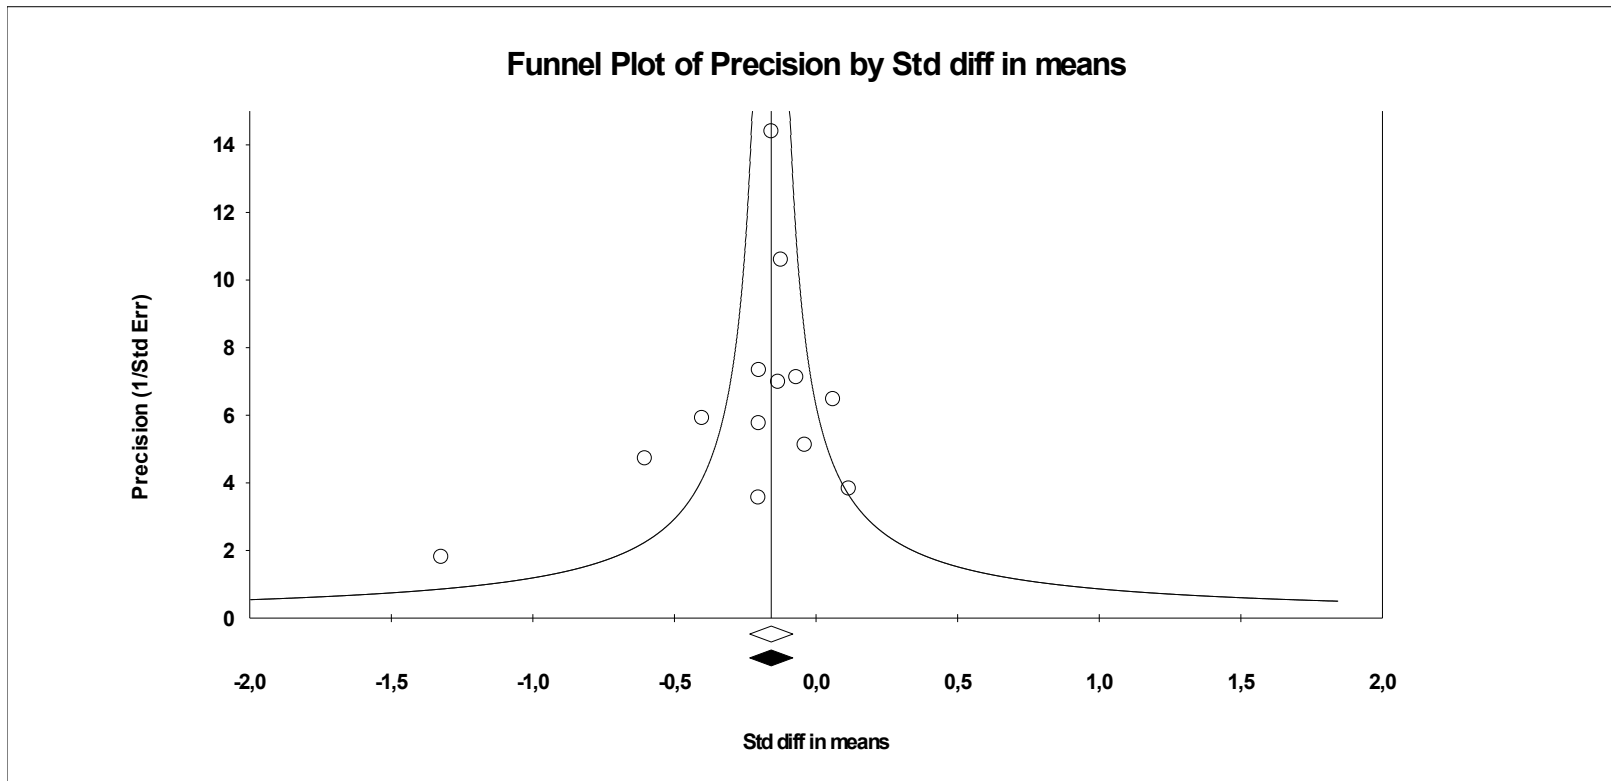

Std diff: standardized difference
